# Supplementary material for: Divergent roles of HDAC1 and HDAC2 in the regulation of epidermal development and tumorigenesis
Source: PubMed Central journal article supplement (PMC3981143; doi:10.1038/emboj.2013.243), 2013-11-15

**Fig 4**

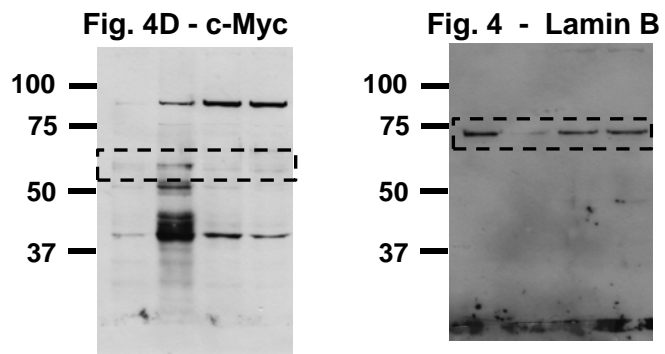

Supplement: emboj2013243df4.pdf [file emboj2013243df4.pdf]
