# Supplementary material for: Divergent roles of HDAC1 and HDAC2 in the regulation of epidermal development and tumorigenesis
Source: PubMed Central journal article supplement (PMC3981143; doi:10.1038/emboj.2013.243), 2013-11-15

**Fig 5**

**Fig. 5E Input**

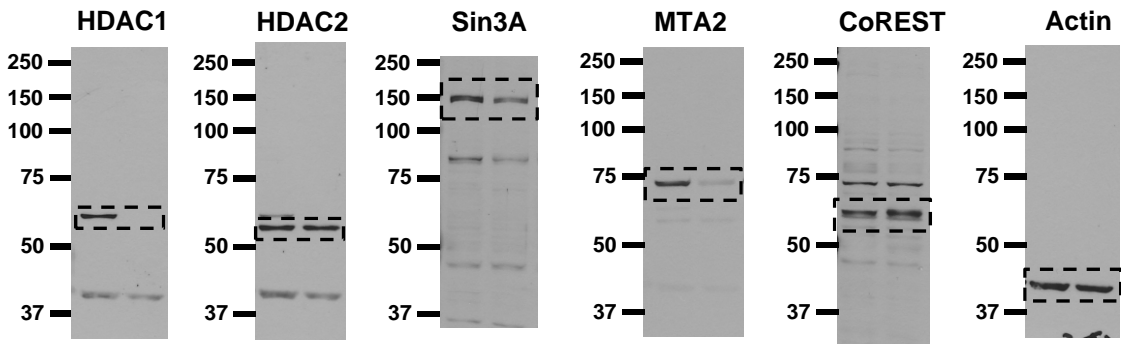

**Fig. 5E Sin3A-IP**

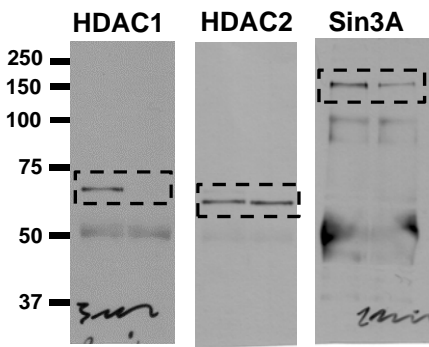

**Fig. 5E MTA2-IP**

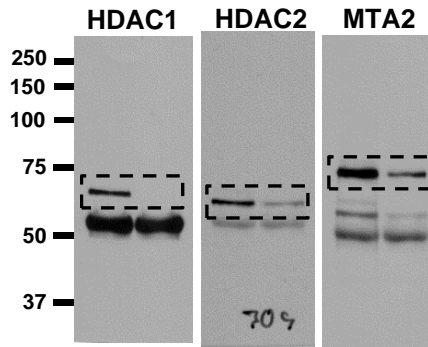

**Fig. 5E CoREST-IP**

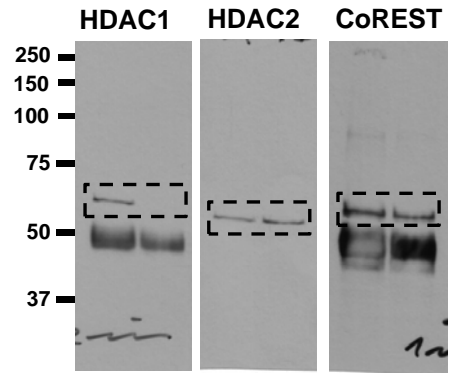

**Fig. 5G Input**

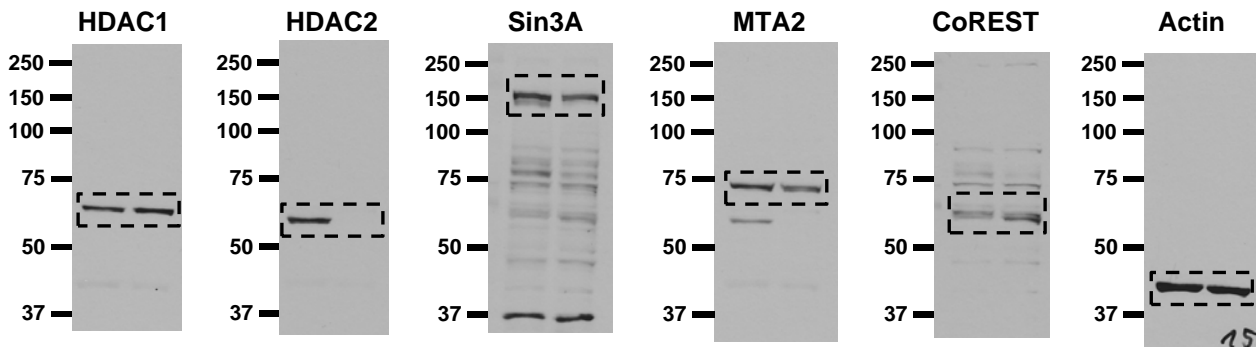

**Fig. 5G Sin3A-IP**

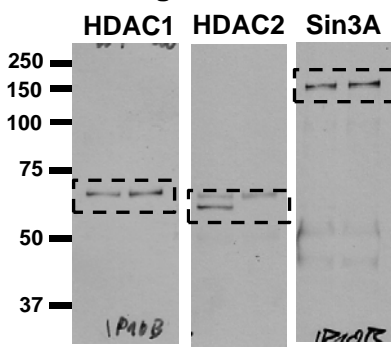

**Fig. 5G MTA2-IP**

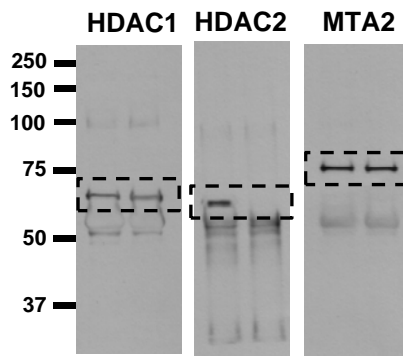

**Fig. 5G CoREST-IP**

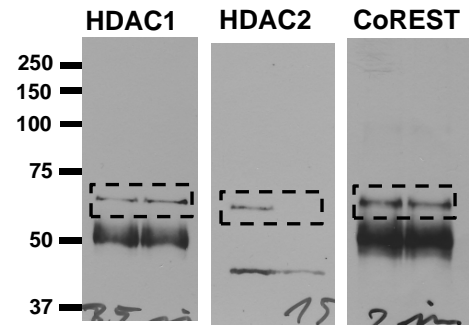

Supplement: emboj2013243df5.pdf [file emboj2013243df5.pdf]
